# Supplementary material for: Size-dependent performance and adaptive mechanisms of anammox granular sludge under fluctuating low-temperature conditions
Source: Research Square preprint supplement (doi:10.21203/rs.3.rs-8311852/v1), 2025-12-15
Supplement: Supplementary file 1 [file 8f266d22ec8cb4bcf15caaf3.docx]

**Supplementary materials for**

### **Size-dependent performance and adaptive mechanisms of anammox granular sludge under fluctuating low-temperature conditions**

### **S1: EPS extraction and 3D-EEM analysis**

The soluble EPS (S-EPS), loosely-bound EPS (LB-EPS) and tightly-bound EPS (LB-EPS) were analyzed based on the method provided by Zhang et al. (2024). The specific steps were presented as fellows: taking 15mL of sludge and putting it into a 50mL centrifuge tube for extraction by high-speed centrifugation. (1) Centrifugation was set at 6000rpm for 10min, and the test tube was taken out and the supernatant was absorbed to obtain S-EPS. (2) LB-EPS was obtained by mixing 0.5% NaCl solution with water bath at 60℃ for 1min to the same volume, centrifugation at 6000rpm for 10min and taking out the test tube and absorbing the supernatant. (3) Add 0.5% NaCl solution to the same volume, then put it in a water bath at 80° for 45min, then centrifuge it at 15000rpm for 20min to obtain the supernatant TB-EPS. The contents of protein (PN) and polysaccharides (PS) of S-EPS, LB-EPS and TB-EPS were determined by improved Lowry Folin method (Frølund et al., 1995) and Anthrone Method (Loewus, 1952). In this study, three-dimensional excitation-emission matrix (3D-EEM) analysis was performed for the extracted S-EPS, LB-EPS and TB-EPS. The detail determination method was same to Zhang et al. (2024).

**References**

Loewus, F.A., 1952. Improvement in anthrone method for determination of carbohydrates. Anal. Chem. 24, 219.

Frølund,, B., Griebe, T., Nielsen, P.H., 1995. Enzymatic activity in the activated-sludge floc matrix. Appl. Microbiol. Biotechnol. 43, 755-761.

Zhang, S., Lai, L.Y., Wang, T.X., Jin, W.L., Yi, R.R., Chen, D.Z., Jin, R.C., Yang, G.F., 2024. Response of anammox to organics with different degradation characteristics and exposure time: Performance, sludge characteristics and bacterial community. Sci. Total Environ. 951, 175650.


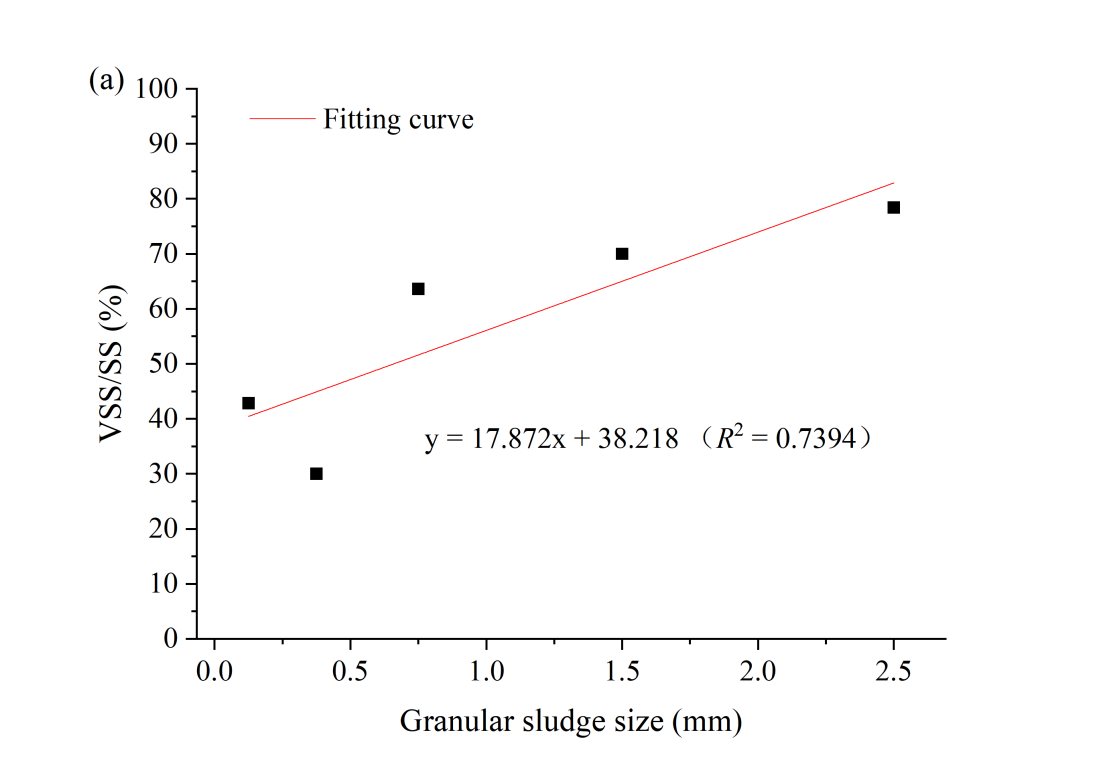


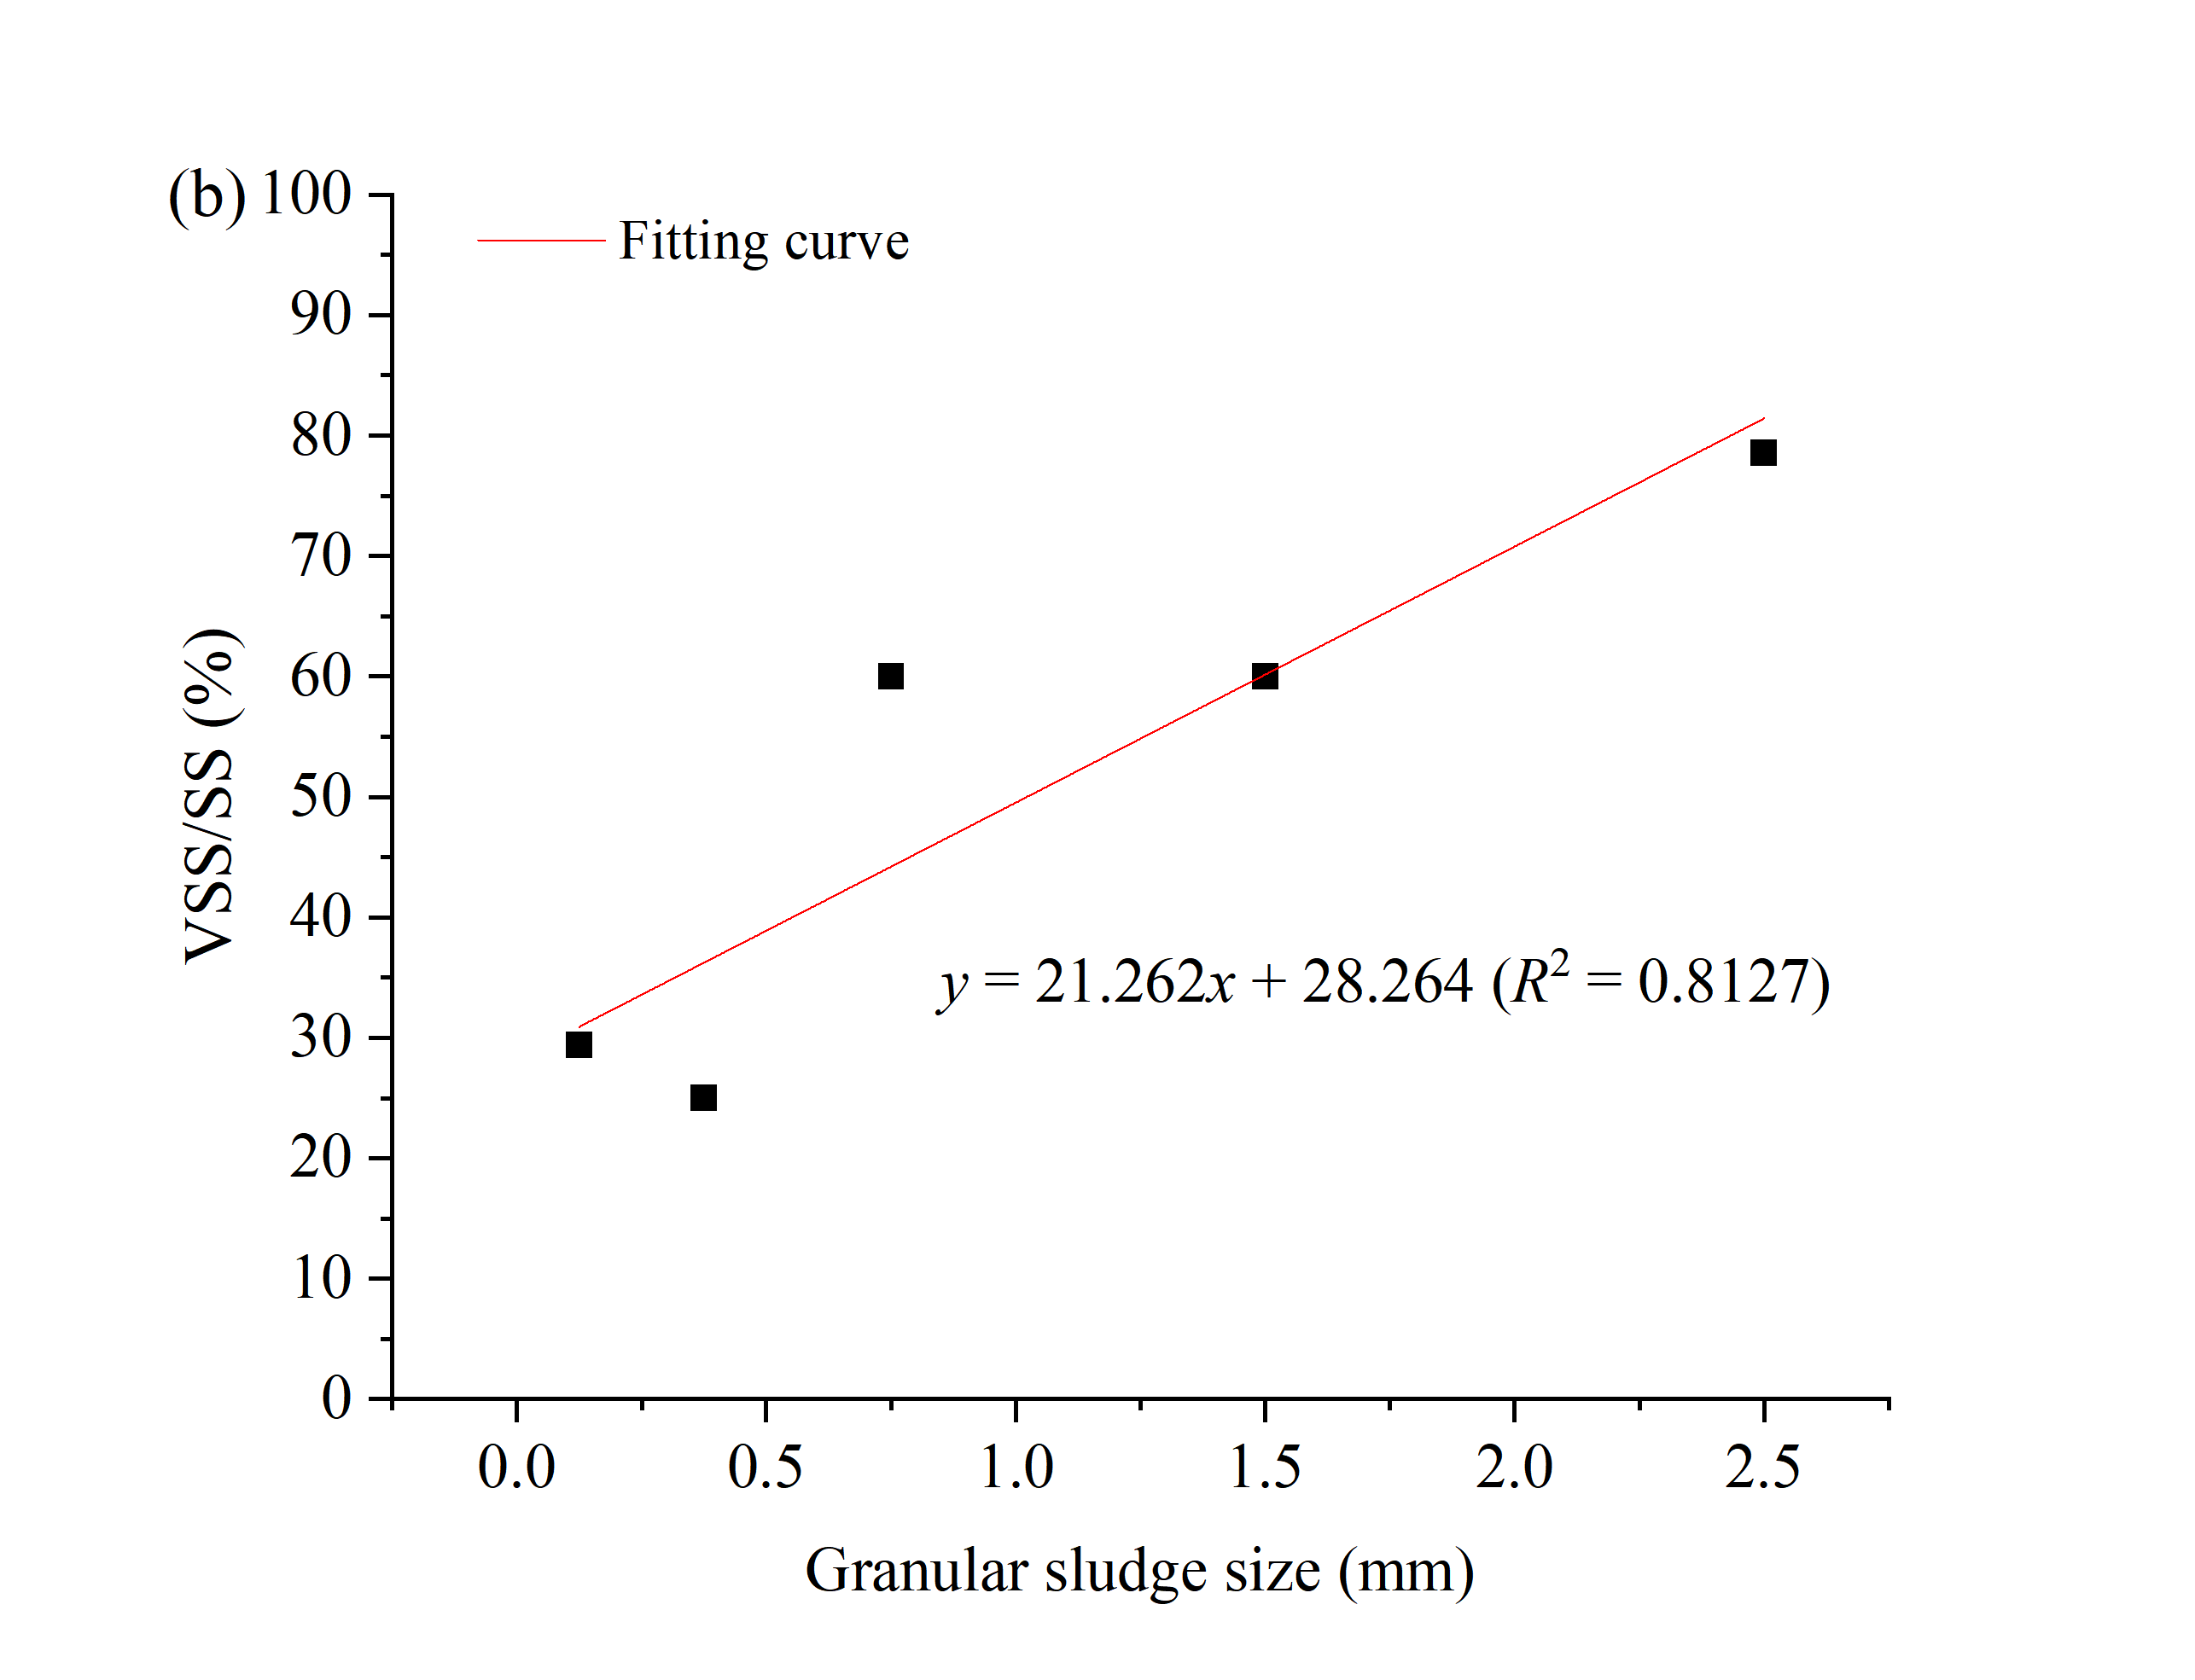


**Fig. S1 The fitting curves of VSS/SS and granular sludge size in both reactors: (a) R1, and (b) R2**

### **S2: 3D-EEM analysis**

While no characteristic peaks were detected in S-EPS or LB-EPS, and TB-EPS exhibited multiple fluorescence peaks across all samples: Tyrosine-like proteins (Peaks A/D/J: 270-280/300-320 nm; 270-280/305-310 nm), Tryptophan-like proteins (Peaks B/E/K/G: 270-280/340-360 nm; 270-280/340-350 nm), Aromatic proteins (Peaks C/F/H/L: 220-230/310-350 nm; 220-230/340-350 nm), and Fulvic acid (Peak I: 230-250/470-490 nm) (Chen et al., 2003; Xu et al., 2022). Three dominant protein-like (PN) peaks were consistently observed in both suspended and settled sludge, aligning with the typical 2-6 peak range reported for anammox systems (Liu et al., 2018). Notably, granular sludge >0.5 mm showed significantly higher PN content than smaller fractions, suggesting particle size-dependent EPS composition (section 3.4.4).

(a)

(b)

(d)

(c)

**Fig. S2 3D-EEM spectra of TB-EPS in suspended and settled sludge from reactors R1 and R2: (a) suspended sludge in R1, (b) settled sludge of R1, (c) suspended sludge in R2, (d) settled sludge of R2.**

(a)

(b)

(c)

(d)

(f)

(e)

(h)

(g)

(j)

(i)

**Fig. S3 3D-EEM of TB-EPS of sludge with different particle sizes in reactors R1 and R2: (a) R1 >2mm, (b) R1 1-2mm, (c) R1 0.5-1mm, (d) R1 0.25-0.5mm, (e) R1 < 0.25mm, (f) R2 >2mm, (g) R2 1-2mm, (h) R2 0.5-1mm, (i) R2 0.25-0.5mm, (j) R2 < 0.25mm.**

# Table S1 Alpha diversity of different anammox granular sludge samples

| Sample | Gene number | Shannon | Simpson |
| --- | --- | --- | --- |
| R1-Ⅰ | 1009213 | 11.473675 | 0.000055 |
| R1-Ⅱ | 1017917 | 11.742368 | 0.000054 |
| R1-Ⅲ | 1040385 | 11.746531 | 0.000043 |
| R1-Ⅳ | 939352 | 11.517908 | 0.000052 |
| R2-Ⅰ | 950792 | 11.384139 | 0.000059 |
| R2-Ⅱ | 961355 | 11.304182 | 0.000077 |
| R2-Ⅲ | 1004534 | 11.470334 | 0.000061 |
| R2-Ⅳ | 1090160 | 11.740349 | 0.000050 |
| R1 >2mm | 971068 | 11.307367 | 0.000081 |
| R1 1-2mm | 1057481 | 11.793009 | 0.000042 |
| R1 0.5-1mm | 1013926 | 11.285253 | 0.000096 |
| R1 0.25-0.5mm | 1452545 | 12.36878 | 0.000028 |
| R1 <0.25mm | 1415618 | 12.619993 | 0.000013 |
| R2 >2mm | 1093614 | 11.472393 | 0.000063 |
| R2 1-2mm | 1096514 | 11.685085 | 0.000048 |
| R2 0.5-1mm | 1277295 | 12.003093 | 0.000042 |
| R2 0.25-0.5mm | 1400492 | 12.576363 | 0.000017 |
| R2 <0.25mm | 1291254 | 12.64745 | 0.000013 |

**Table S2 Relative abundance of AnAOB species (unit: %)**

| Samples | Candidatus_Brocadia_fulgida | Candidatus_Brocadia_sinica | Candidatus_Jettenia_caeni | Candidatus_Kuenenia_stuttgartiensis |
| --- | --- | --- | --- | --- |
| R1-I | 5.74 | 4.91 | 18.77 | 4.15 |
| R1-II | 4.28 | 4.03 | 15.38 | 2.80 |
| R1-III | 5.83 | 4.66 | 12.51 | 3.35 |
| R1-IV | 9.36 | 6.64 | 14.31 | 3.77 |
| R1 <0.25mm | 2.89 | 2.17 | 1.79 | 4.80 |
| R1 0.25-0.5mm | 7.55 | 4.81 | 2.54 | 4.94 |
| R1 0.5-1mm | 15.89 | 9.61 | 5.59 | 6.48 |
| R1 1-2mm | 9.25 | 6.13 | 8.38 | 3.99 |
| R1 >2mm | 5.76 | 5.39 | 23.70 | 2.64 |
| R2-I | 8.94 | 6.58 | 17.70 | 4.10 |
| R2-II | 3.84 | 4.41 | 23.73 | 4.82 |
| R2-III | 8.57 | 6.53 | 16.13 | 6.57 |
| R2-IV | 6.45 | 5.19 | 16.08 | 3.35 |
| R2 <0.25mm | 1.56 | 1.47 | 1.01 | 5.14 |
| R2 0.25-0.5mm | 4.97 | 3.34 | 1.74 | 4.64 |
| R2 0.5-1mm | 9.16 | 5.89 | 4.76 | 4.94 |
| R2 1-2mm | 7.66 | 5.77 | 12.98 | 6.32 |
| R2 >2mm | 8.14 | 6.38 | 18.08 | 4.73 |

**Table S3 Relative abundance of nitrogen removal related genes in granular sludge with different sizes (unit: %)**

| Sludge size | ＞2mm | | 1-2mm | | 0.5-1mm | | 0.25-0.5mm | | <0.25mm | |
| --- | --- | --- | --- | --- | --- | --- | --- | --- | --- | --- |
|  | R1 | R2 | R1 | R2 | R1 | R2 | R1 | R2 | R1 | R2 |
| HOX | 4.63 | 4.65 | 5.13 | 4.85 | 4.69 | 4.82 | 5.15 | 4.87 | 5.12 | 5.15 |
| nirK | 2.04 | 1.75 | 0.97 | 1.40 | 0.82 | 0.85 | 0.77 | 0.70 | 0.94 | 0.78 |
| nirS | 1.06 | 1.07 | 1.39 | 1.30 | 0.92 | 1.09 | 1.28 | 1.20 | 1.52 | 1.45 |
| nirB | 1.39 | 1.07 | 0.85 | 0.89 | 0.45 | 0.40 | 0.42 | 0.38 | 0.49 | 0.54 |
| hzs | 2.67 | 4.46 | 5.71 | 4.96 | 7.53 | 6.61 | 4.27 | 3.54 | 1.62 | 1.14 |
| hdh | 0.41 | 0.41 | 0.60 | 0.60 | 0.57 | 0.77 | 0.91 | 0.88 | 0.97 | 0.99 |
| hao | 5.61 | 5.43 | 4.28 | 4.81 | 4.67 | 3.67 | 2.68 | 2.03 | 1.45 | 1.10 |
| nxrA | 8.13 | 7.51 | 5.78 | 6.43 | 5.96 | 5.00 | 5.10 | 4.24 | 4.96 | 4.14 |
| nxrB | 2.66 | 2.42 | 2.72 | 2.64 | 2.85 | 2.60 | 3.07 | 2.65 | 3.14 | 2.91 |
| amo | 0.07 | 0.04 | 0.31 | 0.06 | 0.84 | 0.24 | 0.49 | 0.29 | 0.32 | 0.29 |
| narG | 2.82 | 4.63 | 5.93 | 5.14 | 7.62 | 6.76 | 4.40 | 3.69 | 1.79 | 1.33 |
| nasA | 2.98 | 4.80 | 6.16 | 5.32 | 7.71 | 6.91 | 4.53 | 3.83 | 1.96 | 1.52 |
| nrfA | 3.07 | 3.03 | 2.44 | 2.71 | 2.42 | 2.35 | 1.87 | 1.66 | 1.57 | 1.39 |
| nirA | 0.03 | 0.02 | 0.03 | 0.03 | 0.02 | 0.04 | 0.04 | 0.05 | 0.05 | 0.05 |
| nosZ | 0.14 | 0.14 | 0.18 | 0.16 | 0.14 | 0.16 | 0.27 | 0.23 | 0.26 | 0.33 |
| norB | 0.88 | 0.95 | 1.09 | 1.03 | 0.89 | 1.20 | 1.29 | 1.30 | 1.33 | 1.24 |

**Table S4 Relative abundance of nitrogen removal related genes at different operational stages in both anammox reactors (unit: %)**

| Stage | Ⅰ | | Ⅱ | | Ⅲ | | Ⅳ | |
| --- | --- | --- | --- | --- | --- | --- | --- | --- |
|  | R1 | R2 | R1 | R2 | R1 | R2 | R1 | R2 |
| HOX | 4.92 | 4.79 | 5.18 | 5.05 | 5.11 | 4.82 | 4.64 | 5.00 |
| nirK | 1.75 | 1.65 | 1.83 | 2.16 | 1.67 | 1.68 | 1.43 | 1.67 |
| nirS | 1.06 | 0.83 | 1.55 | 1.39 | 1.43 | 1.19 | 1.00 | 1.22 |
| nirB | 1.10 | 0.97 | 1.05 | 1.51 | 0.91 | 1.08 | 0.92 | 1.01 |
| hzs | 1.93 | 2.56 | 2.82 | 1.49 | 3.45 | 4.00 | 4.20 | 4.50 |
| hdh | 0.51 | 0.50 | 0.61 | 0.48 | 0.55 | 0.54 | 0.44 | 0.57 |
| hao | 3.96 | 4.01 | 4.54 | 4.83 | 4.34 | 5.30 | 4.69 | 4.93 |
| nxrA | 7.27 | 7.21 | 7.13 | 7.61 | 6.53 | 7.19 | 7.05 | 7.02 |
| nxrB | 2.88 | 3.07 | 2.51 | 2.69 | 2.50 | 2.69 | 2.89 | 2.54 |
| amo | 0.06 | 0.07 | 0.19 | 0.04 | 0.21 | 0.08 | 0.05 | 0.02 |
| narG | 2.10 | 2.68 | 3.06 | 1.71 | 3.70 | 4.16 | 4.38 | 4.71 |
| nasA | 2.27 | 2.81 | 3.30 | 1.93 | 3.95 | 4.32 | 4.56 | 4.92 |
| nrfA | 2.62 | 2.58 | 2.75 | 2.76 | 2.65 | 2.74 | 2.73 | 2.83 |
| nirA | 0.02 | 0.02 | 0.03 | 0.02 | 0.04 | 0.03 | 0.03 | 0.02 |
| nosZ | 0.13 | 0.15 | 0.17 | 0.16 | 0.15 | 0.16 | 0.17 | 0.22 |
| norB | 0.88 | 0.75 | 1.16 | 0.81 | 1.06 | 0.86 | 0.85 | 1.08 |
